# Supplementary material for: Development of a prognostic model for glioblastoma multiforme based on the expression levels of efferocytosis-related genes
Source: publisher site journal article supplement (doi:10.18632/aging.205422), 2023-12-29
Supplement: Supplementary file [file aging-v15i24-205422-supplementary-material-SD1.pdf]

## SUPPLEMENTARY TABLE

Supplementary Table 1. The list of R packages and software used in this study.

| <b>R package/software</b> | <b>Version</b> | <b>Link</b>                                                                                                               |
|---------------------------|----------------|---------------------------------------------------------------------------------------------------------------------------|
| ClusterProfiler           | 4.0.5          | <a href="https://git.bioconductor.org/packages/clusterProfiler">https://git.bioconductor.org/packages/clusterProfiler</a> |
| DESeq2                    | 1.34.0         | <a href="https://github.com/mikelove/DESeq2">https://github.com/mikelove/DESeq2</a>                                       |
| ggplot2                   | 3.3.5          | <a href="https://github.com/tidyverse/ggplot2">https://github.com/tidyverse/ggplot2</a>                                   |
| pheatmap                  | 1.0.12         | <a href="https://github.com/raivokolde/pheatmap">https://github.com/raivokolde/pheatmap</a>                               |
| ggvenn                    | 0.1.9          | <a href="https://github.com/yanlinlin82/ggvenn">https://github.com/yanlinlin82/ggvenn</a>                                 |
| survival                  | 3.2–13         | <a href="https://github.com/therneau/survival">https://github.com/therneau/survival</a>                                   |
| survminer                 | 0.4.9          | <a href="https://github.com/kassambara/survminer">https://github.com/kassambara/survminer</a>                             |
| forestplot                | 2.0.1          | <a href="https://github.com/gforge/forestplot">https://github.com/gforge/forestplot</a>                                   |
| GSVA                      | 1.42.0         | <a href="https://github.com/rcastelo/GSVA">https://github.com/rcastelo/GSVA</a>                                           |
| glmnet                    | 4.1–2          | <a href="https://glmnet.stanford.edu/">https://glmnet.stanford.edu/</a>                                                   |
| pRRophetic                | 0.5            | <a href="https://osf.io/5xvsg/wiki/home/">https://osf.io/5xvsg/wiki/home/</a>                                             |
| rms                       | 6.2–0          | <a href="https://hbiostat.org/R/rms/">https://hbiostat.org/R/rms/</a>                                                     |
| estimate                  | 1.0.13         | <a href="https://r-forge.r-project.org/projects/estimate/">https://r-forge.r-project.org/projects/estimate/</a>           |
